# Supplementary material for: Metastatic pathway and the microvascular and physicochemical microenvironments of human melanoma xenografts
Source: Springer Nature journal article supplement (doi:10.1186/s12967-017-1307-4), 2017-10-10
Supplement: MOESM1 [file 15124162]

## **Additional file 1: Table S1 to:**

### **Metastatic pathway and the microvascular and physicochemical microenvironments of human melanoma xenografts**

Ruixia Huang<sup>1</sup>, Lise Mari K. Andersen<sup>1</sup> and Einar K. Rofstad<sup>1\*</sup>

<sup>1</sup>Group of Radiation Biology and Tumor Physiology, Department of Radiation Biology, Institute for Cancer Research, Oslo University Hospital, Oslo, Norway

#### E-mail addresses:

Ruixia Huang ([ruixia.huang@rr-research.no](mailto:ruixia.huang@rr-research.no))

Lise Mari K. Andersen ([lise.mari.klepp.andersen@rr-research.no](mailto:lise.mari.klepp.andersen@rr-research.no))

Einar K. Rofstad ([einar.k.rofstad@rr-research.no](mailto:einar.k.rofstad@rr-research.no))

\* Correspondence: Einar K. Rofstad, Department of Radiation Biology, Institute for Cancer Research, Norwegian Radium Hospital, Box 4953 Nydalen, 0424 Oslo, Norway.

Phone: 47-2278-1206; Fax: 47-2278-1207; E-mail: [einar.k.rofstad@rr-research.no](mailto:einar.k.rofstad@rr-research.no)

**Additional file 1: Table S1.** Angiogenesis-related genes included in the PCR array\*

| Gene Refseq** | Symbol  | Name                                                                                    |
|---------------|---------|-----------------------------------------------------------------------------------------|
| NM_005163     | AKT1    | V-akt murine thymoma viral oncogene homolog 1                                           |
| NM_001145     | ANG     | Angiogenin. ribonuclease. RNase A family. 5                                             |
| NM_001146     | ANGPT1  | Angiopoietin 1                                                                          |
| NM_001147     | ANGPT2  | Angiopoietin 2                                                                          |
| NM_001039667  | ANGPTL4 | Angiopoietin-like 4                                                                     |
| NM_001150     | ANPEP   | Alanyl (membrane) aminopeptidase                                                        |
| NM_001702     | BAI1    | Brain-specific angiogenesis inhibitor 1                                                 |
| NM_002986     | CCL11   | Chemokine (C-C motif) ligand 11                                                         |
| NM_002982     | CCL2    | Chemokine (C-C motif) ligand 2                                                          |
| NM_001795     | CDH5    | Cadherin 5. type 2 (vascular endothelium)                                               |
| NM_030582     | COL18A1 | Collagen. type XVIII. alpha 1                                                           |
| NM_000091     | COL4A3  | Collagen. type IV. alpha 3 (Goodpasture antigen)                                        |
| NM_001901     | CTGF    | Connective tissue growth factor                                                         |
| NM_001511     | CXCL1   | Chemokine (C-X-C motif) ligand 1 (melanoma growth stimulating activity. alpha)          |
| NM_001565     | CXCL10  | Chemokine (C-X-C motif) ligand 10                                                       |
| NM_002994     | CXCL5   | Chemokine (C-X-C motif) ligand 5                                                        |
| NM_002993     | CXCL6   | Chemokine (C-X-C motif) ligand 6 (granulocyte chemotactic protein 2)                    |
| NM_002416     | CXCL9   | Chemokine (C-X-C motif) ligand 9                                                        |
| NM_001955     | EDN1    | Endothelin 1                                                                            |
| NM_182685     | EFNA1   | Ephrin-A1                                                                               |
| NM_004093     | EFNB2   | Ephrin-B2                                                                               |
| NM_001963     | EGF     | Epidermal growth factor                                                                 |
| NM_000118     | ENG     | Endoglin                                                                                |
| NM_004444     | EPHB4   | EPH receptor B4                                                                         |
| NM_004448     | ERBB2   | V-erb-b2 receptor tyrosine kinase 2                                                     |
| NM_001993     | F3      | Coagulation factor III (thromboplastin. tissue factor)                                  |
| NM_000800     | FGF1    | Fibroblast growth factor 1 (acidic)                                                     |
| NM_002006     | FGF2    | Fibroblast growth factor 2 (basic)                                                      |
| NM_000142     | FGFR3   | Fibroblast growth factor receptor 3                                                     |
| NM_004469     | FIGF    | C-fos induced growth factor (vascular endothelial growth factor D)                      |
| NM_002019     | FLT1    | Fms-related tyrosine kinase 1 (VEGFR1)                                                  |
| NM_002026     | FN1     | Fibronectin 1                                                                           |
| NM_000601     | HGF     | Hepatocyte growth factor (hepapoietin A; scatter factor)                                |
| NM_001530     | HIF1A   | Hypoxia inducible factor 1. alpha subunit (basic helix-loop-helix transcription factor) |
| NM_006665     | HPSE    | Heparanase                                                                              |
| NM_002165     | ID1     | Inhibitor of DNA binding 1. dominant negative helix-loop-helix protein                  |
| NM_024013     | IFNA1   | Interferon. alpha 1                                                                     |
| NM_000619     | IFNG    | Interferon. gamma                                                                       |
| NM_000618     | IGF1    | Insulin-like growth factor 1 (somatomedin C)                                            |
| NM_000576     | IL1B    | Interleukin 1. beta                                                                     |
| NM_000600     | IL6     | Interleukin 6 (interferon. beta 2)                                                      |
| NM_000584     | IL8     | Interleukin 8                                                                           |
| NM_002210     | ITGAV   | Integrin. alpha V (vitronectin receptor. alpha polypeptide. antigen CD51)               |
| NM_000212     | ITGB3   | Integrin. beta 3 (platelet glycoprotein IIIa. antigen CD61)                             |
| NM_000214     | JAG1    | Jagged 1                                                                                |
| NM_002253     | KDR     | Kinase insert domain receptor (a type III receptor tyrosine kinase)                     |
| NM_007015     | LECT1   | Leukocyte cell derived chemotaxin 1                                                     |

|           |          |                                                                                                        |
|-----------|----------|--------------------------------------------------------------------------------------------------------|
| NM_000230 | LEP      | Leptin                                                                                                 |
| NM_002391 | MDK      | Midkine (neurite growth-promoting factor 2)                                                            |
| NM_004995 | MMP14    | Matrix metalloproteinase 14 (membrane-inserted)                                                        |
| NM_004530 | MMP2     | Matrix metalloproteinase 2 (gelatinase A. 72kDa gelatinase. 72kDa type IV collagenase)                 |
| NM_004994 | MMP9     | Matrix metalloproteinase 9 (gelatinase B. 92kDa gelatinase. 92kDa type IV collagenase)                 |
| NM_000603 | NOS3     | Nitric oxide synthase 3 (endothelial cell)                                                             |
| NM_004557 | NOTCH4   | Notch 4                                                                                                |
| NM_003873 | NRP1     | Neuropilin 1                                                                                           |
| NM_003872 | NRP2     | Neuropilin 2                                                                                           |
| NM_002607 | PDGFA    | Platelet-derived growth factor alpha polypeptide                                                       |
| NM_000442 | PECAM1   | Platelet/endothelial cell adhesion molecule                                                            |
| NM_002619 | PF4      | Platelet factor 4                                                                                      |
| NM_002632 | PGF      | Placental growth factor                                                                                |
| NM_002658 | PLAU     | Plasminogen activator. urokinase                                                                       |
| NM_000301 | PLG      | Plasminogen                                                                                            |
| NM_021935 | PROK2    | Prokineticin 2                                                                                         |
| NM_000962 | PTGS1    | Prostaglandin-endoperoxide synthase 1 (prostaglandin G/H synthase and cyclooxygenase)                  |
| NM_001400 | S1PR1    | Sphingosine-1-phosphate receptor 1                                                                     |
| NM_000602 | SERPINE1 | Serpin peptidase inhibitor. clade E (nexin. plasminogen activator inhibitor type 1). member 1          |
| NM_002615 | SERPINF1 | Serpin peptidase inhibitor. clade F (alpha-2 antiplasmin. pigment epithelium derived factor). member 1 |
| NM_021972 | SPHK1    | Sphingosine kinase 1                                                                                   |
| NM_000459 | TEK      | TEK tyrosine kinase. endothelial                                                                       |
| NM_003236 | TGFA     | Transforming growth factor. alpha                                                                      |
| NM_000660 | TGFB1    | Transforming growth factor. beta 1                                                                     |
| NM_003238 | TGFB2    | Transforming growth factor. beta 2                                                                     |
| NM_004612 | TGFBR1   | Transforming growth factor. beta receptor 1                                                            |
| NM_003246 | THBS1    | Thrombospondin 1                                                                                       |
| NM_003247 | THBS2    | Thrombospondin 2                                                                                       |
| NM_005424 | TIE1     | Tyrosine kinase with immunoglobulin-like and EGF-like domains 1                                        |
| NM_003254 | TIMP1    | TIMP metalloproteinase inhibitor 1                                                                     |
| NM_003255 | TIMP2    | TIMP metalloproteinase inhibitor 2                                                                     |
| NM_000362 | TIMP3    | TIMP metalloproteinase inhibitor 3                                                                     |
| NM_000594 | TNF      | Tumor necrosis factor                                                                                  |
| NM_001953 | TYMP     | Thymidine phosphorylase                                                                                |
| NM_003376 | VEGFA    | Vascular endothelial growth factor A                                                                   |
| NM_003377 | VEGFB    | Vascular endothelial growth factor B                                                                   |
| NM_005429 | VEGFC    | Vascular endothelial growth factor C                                                                   |

\* Human angiogenesis RT<sup>2</sup> Profiler™ PCR array (Catalog number PAHS-024Z, SABiosciences/Qiagen). \*\*NCBI reference sequence database.
