# Supplementary material for: Metastatic pathway and the microvascular and physicochemical microenvironments of human melanoma xenografts
Source: Springer Nature journal article supplement (doi:10.1186/s12967-017-1307-4), 2017-10-10
Supplement: MOESM2 [file 15124162]

## **Additional file 2: Figure S1 to:**

### **Metastatic pathway and the microvascular and physicochemical microenvironments of human melanoma xenografts**

Ruixia Huang<sup>1</sup>, Lise Mari K. Andersen<sup>1</sup> and Einar K. Rofstad<sup>1\*</sup>

<sup>1</sup>Group of Radiation Biology and Tumor Physiology, Department of Radiation Biology, Institute for Cancer Research, Oslo University Hospital, Oslo, Norway

#### E-mail addresses:

Ruixia Huang ([ruixia.huang@rr-research.no](mailto:ruixia.huang@rr-research.no))

Lise Mari K. Andersen ([lise.mari.klepp.andersen@rr-research.no](mailto:lise.mari.klepp.andersen@rr-research.no))

Einar K. Rofstad ([einar.k.rofstad@rr-research.no](mailto:einar.k.rofstad@rr-research.no))

\* Correspondence: Einar K. Rofstad, Department of Radiation Biology, Institute for Cancer Research, Norwegian Radium Hospital, Box 4953 Nydalen, 0424 Oslo, Norway.

Phone: 47-2278-1206; Fax: 47-2278-1207; E-mail: [einar.k.rofstad@rr-research.no](mailto:einar.k.rofstad@rr-research.no)

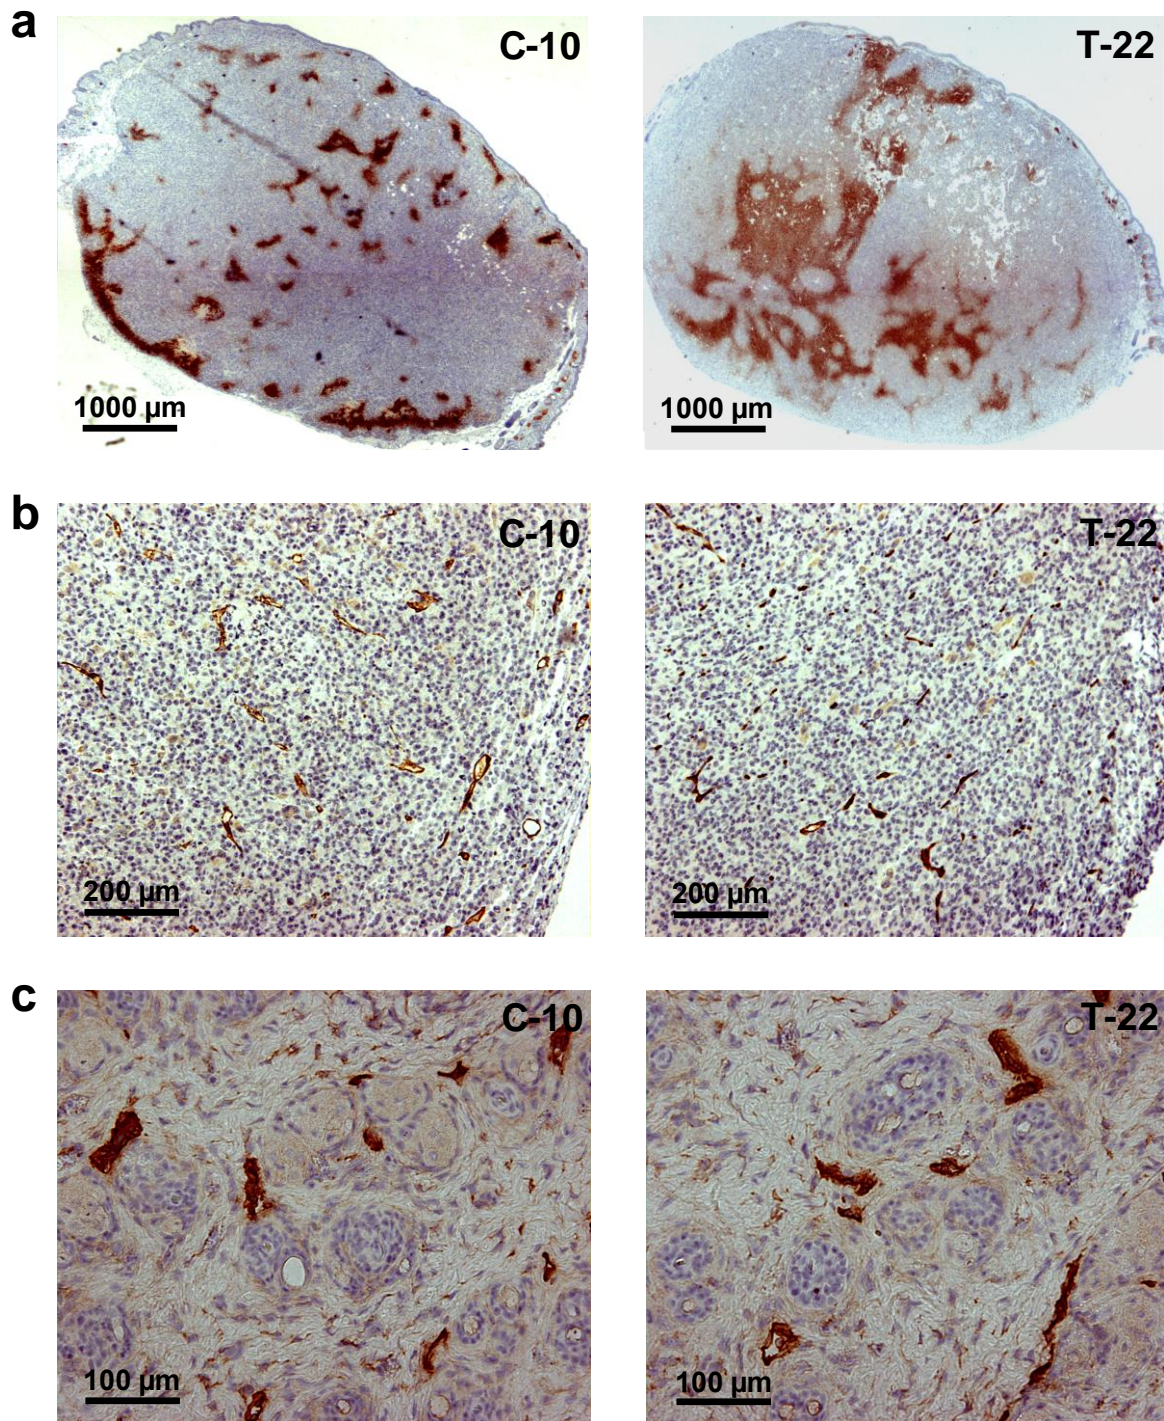

**Additional file 2: Figure S1** Immunohistochemical preparations. Histological preparations of a representative C-10 tumor and a representative T-22 tumor immunostained for pimonidazole to visualize hypoxia (a), immunostained for CD31 to visualize tumor blood vessels (b), and immunostained for LYVE-1 to visualize peritumoral lymphatics in skin (c). The images show the general quality of the preparations used for assessment of fraction of hypoxic tumor tissue, peripheral tumor blood vessel density, and peritumoral lymph vessel density in C-10, D-12, E-13, N-15, R-18, and T-22 melanoma xenografts grown in adult (8–12 weeks of age) female BALB/c *nu/nu* mice. The C-10, D-12, and E-13 models did not differ from the N-15, R-18, and T-22 models in fraction of hypoxic tumor tissue, peripheral tumor blood vessel density, or peritumoral lymph vessel density, as illustrated qualitatively by using a C-10 and a T-22 tumor as examples.
